# Supplementary material
Source: MDPI journal article supplement (https://www.mdpi.com/2077-1312/12/5/802)
Supplement: s1 [file s1]

**Supplementary Table S1.** List of studies on pneumatophores and the associated prokaryotic community (1975–2022).

| S. No. | Title of the study                                                                                                                                                                                               | Citation | Reference |
|--------|------------------------------------------------------------------------------------------------------------------------------------------------------------------------------------------------------------------|----------|-----------|
| 1      | The core mangrove microbiome reveals shared taxa potentially involved in nutrient cycling and promoting host survival                                                                                            | 6        | [100]     |
| 2      | Distribution and extracellular enzyme production of cultivable bacteria isolated from pneumatophores of Ayiramthengu mangrove ecosystem of Kerala coast                                                          | 0        | [84]      |
| 3      | Isolation and metabolic profile identification of four bioremedial endophytic bacterial colonies from the pneumatophore of <i>Avicennia officinalis</i> from Poovar mangrove, north east coast of Kerala, India. | 0        | [86]      |
| 4      | Epibiotic communities (microalgae and meiofauna) on the pneumatophores of <i>Avicennia officinalis</i> (L.)                                                                                                      | 4        | [52]      |
| 5      | LC-MS based identification of secondary metabolites from marine antagonistic endophytic bacteria                                                                                                                 | 4        | [85]      |
| 6      | Occurrence of phosphate-solubilizing bacteria in rhizospheric and pneumatophoric sediment of <i>Avicennia marina</i>                                                                                             | 6        | [83]      |
| 7      | Pyrosequencing-based seasonal observation of prokaryotic diversity in pneumatophore-associated soil of <i>Avicennia marina</i>                                                                                   | 17       | [32]      |
| 8      | Biodiversity and toxin production of cyanobacteria in mangrove swamps in the Red Sea off the southern coast of Saudi Arabia                                                                                      | 15       | [73]      |
| 9      | Mangrove-associated macroalgae and cyanobacteria in Shark Bay, Western Australia                                                                                                                                 | 1        | [75]      |
| 10     | Epiphytic cyanobacteria on <i>Avicennia marina</i> pneumatophore in mangrove ecosystem of Cagar Alam Pulau Dua (CAPD) Serang, Banten (conference proceeding)                                                     | 5        | [76]      |
| 11     | Cyanobacterial biodiversity at mangrove vegetation of Kadalundi, Kerala.                                                                                                                                         | 0        | [77]      |
| 12     | Newly isolated Chl d-containing cyanobacteria                                                                                                                                                                    | 4        | [79]      |
| 13     | Cyanobacteria and macroalgae from an arid environment mangrove on the east coast of the Baja California Peninsula                                                                                                | 7        | [71]      |
| 14     | A novel epiphytic chlorophyll d-containing cyanobacterium isolated from a mangrove-associated red alga                                                                                                           | 33       | [78]      |
| 15     | Plant growth promoting of endophytic <i>Sporosarcina aquimarina</i> SjAM16103 isolated from the pneumatophores of <i>Avicennia marina</i> L.                                                                     | 23       | [81]      |

|    |                                                                                                                                                                                                                  |    |      |
|----|------------------------------------------------------------------------------------------------------------------------------------------------------------------------------------------------------------------|----|------|
| 16 | Biodiversity and temporal distribution of Chroococcales (Cyanoprokaryota) of an arid mangrove on the east coast of Baja California Sur, Mexico                                                                   | 4  | [57] |
| 17 | Endophytic bacteria isolated from the pneumatophores of <i>Avicennia marina</i>                                                                                                                                  | 21 | [80] |
| 18 | Epiphytic organisms on the pneumatophores of the mangrove <i>Avicennia marina</i> : occurrence and possible function                                                                                             | 6  | [82] |
| 19 | The distribution of algae epiphytic on pneumatophores of the mangrove, <i>Avicennia marina</i> , at different salinities in the Kosi System                                                                      | 7  | [55] |
| 20 | Biological N <sub>2</sub> -fixation on mangrove pneumatophores: Preliminary observations and perspectives                                                                                                        | 26 | [47] |
| 21 | Cyanobacterial diversity and nitrogen fixation in coastal areas around Zanzibar, Tanzania                                                                                                                        | 18 | [36] |
| 22 | Monitoring of black mangrove restoration with nursery-reared seedlings on an arid coastal lagoon                                                                                                                 | 83 | [91] |
| 23 | Biodiversity and distribution of epiphytes community associated with pneumatophores of the mangal <i>Avicennia marina</i> (Forssk.) Vierh, along Egyptian Red Sea coast                                          | 3  | [72] |
| 24 | In vitro transfer of fixed nitrogen from diazotrophic filamentous cyanobacteria to black mangrove seedlings                                                                                                      | 48 | [92] |
| 25 | A comparison of nitrogen fixation (acetylene reduction) among three species of mangrove litter, sediments, and pneumatophores in south Florida, USA                                                              | 57 | [48] |
| 26 | Vertical zonation of epiphytic algae associated with <i>Avicennia marina</i> (Forssk.) Vierh. pneumatophores at Beachwood Mangroves Nature Reserve, Durban, South Africa                                         | 25 | [34] |
| 27 | Cyanobacteria and black mangroves in Northwestern Mexico: Colonization, and diurnal and seasonal nitrogen fixation on aerial roots                                                                               | 61 | [42] |
| 28 | In vitro colonization and increase in nitrogen fixation of seedling roots of black mangrove inoculated by a filamentous cyanobacteria                                                                            | 53 | [70] |
| 29 | Horizontal zonation of epiphytic algae associated with <i>Avicennia marina</i> (Forssk.) Vierh. pneumatophores at Beachwood Mangroves Nature Reserve, Durban, South Africa                                       | 19 | [69] |
| 30 | Intertidal and subtidal blue-green algal mats of open and mangrove areas in the Farasan Archipelago (Saudi Arabia), Red Sea                                                                                      | 61 | [58] |
| 31 | Biological nitrogen fixation (acetylene reduction) associated with blue-green algal (cyanobacterial) communities in the Beachwood Mangrove Nature Reserve II. Seasonal variation in acetylene reduction activity | 11 | [37] |
| 32 | Cyanophyceae associated with mangrove trees at Inhaca Island, Mozambique                                                                                                                                         | 16 | [74] |

|    |                                                                                                                                                                                                                                   |    |      |
|----|-----------------------------------------------------------------------------------------------------------------------------------------------------------------------------------------------------------------------------------|----|------|
| 33 | Biomass of algae epiphytic on pneumatophores of the mangrove, <i>Avicennia marina</i> , in the St Lucia estuary                                                                                                                   | 25 | [50] |
| 34 | Algae associated with mangroves in southern African estuaries: Cyanophyceae                                                                                                                                                       | 23 | [68] |
| 35 | Biological nitrogen fixation (acetylene reduction) associated with blue-green algal (cyanobacterial) communities in the Beachwood Mangrove Nature Reserve. I. The effect of environmental factors on acetylene reduction activity | 22 | [33] |
| 36 | Nitrogen fixation associated with the New Zealand mangrove ( <i>Avicennia marina</i> (Forsk.) Vierh. var. <i>resinifera</i> (Forst. f.) Bakh.)                                                                                    | 78 | [46] |
| 37 | Blue-green algae (Cyanophyta) in marine coastal environments of the Sinai Peninsula; distribution, zonation, stratification and taxonomic diversity                                                                               | 96 | [67] |
| 38 | Nitrogen fixation (acetylene reduction) associated with communities of heterocystous and non-heterocystous blue-green algae in mangrove forests of Sinai                                                                          | 93 | [51] |
| 39 | The blue-green algae of the mangrove forests of Sinai                                                                                                                                                                             | 13 | [95] |
| 40 | Mangrove-associated nitrogen fixation                                                                                                                                                                                             | 30 | [45] |

**Supplementary Table S2.** List of cyanobacteria reported on pneumatophores of mangroves at different locations.

| Cyanobacteria                                                           | Methodology                                                                                   | Habitat                                                                                                                                        | Location and Country                                                                                                                                                    | Reference     |
|-------------------------------------------------------------------------|-----------------------------------------------------------------------------------------------|------------------------------------------------------------------------------------------------------------------------------------------------|-------------------------------------------------------------------------------------------------------------------------------------------------------------------------|---------------|
| <i>Acaryochloris</i> sp.<br>MPGRS1                                      | Isolation and 16s rDNA<br>identification                                                      | Epiphytic on red algae on <i>A. marina</i> (Forsk.)<br>Vierh. pneumatophores                                                                   | Salt Pan Creek, Georges River, Australia                                                                                                                                | [75]          |
| <i>Acaryochloris</i> sp.<br>Mangrove1                                   | Isolation and 16s rDNA<br>identification                                                      | Epiphytic on red algae on mangrove<br>pneumatophores                                                                                           | Georges river, Sydney, Australia                                                                                                                                        | [80]          |
| <i>Anabaena</i> sp.                                                     | Isolation and<br>microscopic<br>identification                                                | Epiphytic on <i>A. germinans</i> (L.) stern<br>pneumatophores                                                                                  | Balandra coastal lagoon, Baja California Sur,<br>Mexico                                                                                                                 | [44]          |
| <i>Aphanocapsa</i> sp.                                                  | Microscopic observation<br>and identification;<br>isolation and microscopic<br>identification | Epiphytic on <i>Sonneratia alba</i> , <i>A. germinans</i> , and<br><i>A. marina</i> pneumatophores                                             | Gulf of Elat, Sinai Peninsula; Mangrove<br>areas around Zanzibar; East coast of the Baja<br>California Peninsula, Mexico; Cagar Alam<br>Pulau Dua (CAPD) Serang, Banten | [36,67,71,76] |
| <i>A. conferta</i> (formerly <i>A. elachista</i> var. <i>conferta</i> ) | Microscopic observation<br>and identification                                                 | Within algal mucilage on <i>A. marina</i> (Forssk.)<br>Vierh. pneumatophores; epiphytic on <i>A. marina</i><br>(Forssk.) Vierh. pneumatophores | Mangroves in southern African estuaries;<br>Kosi system, South Africa; Beachwood<br>Mangroves Nature Reserve, South Africa                                              | [34,55,68]    |
| <i>A. litoralis</i>                                                     | Microscopic observation                                                                       | Epiphytic on <i>A. germinans</i> pneumatophores                                                                                                | East coast of the Baja California Peninsula,<br>Mexico                                                                                                                  | [57,71]       |
| <i>A. muscicola</i> (formerly<br><i>A. montana</i> )                    | Microscopic observation<br>and identification                                                 | Within algal mucilage on <i>A. marina</i> (Forssk.)<br>Vierh. pneumatophores; epiphytic on <i>A. marina</i><br>(Forssk.) Vierh. pneumatophores | Mangroves in southern African estuaries;<br>Kosi system, South Africa                                                                                                   | [55,68]       |
| <i>Aphanothece</i> sp.                                                  | Isolation and<br>microscopic<br>identification                                                | Epiphytic on <i>A. marina</i> pneumatophores                                                                                                   | Cagar Alam Pulau Dua (CAPD) Serang,<br>Banten                                                                                                                           | [76]          |
| <i>A. stagnina</i>                                                      | Microscopic observation                                                                       | Epiphytic on <i>A. marina</i> (Forssk.) Vierh.<br>pneumatophores                                                                               | Inhaca Island, Mozambique,                                                                                                                                              | [74]          |
| <i>Arthrospira platensis</i>                                            | Microscopic observation                                                                       | Epiphytic on <i>A. marina</i> (Forssk.) Vierh.<br>pneumatophores                                                                               | Inhaca Island, Mozambique,                                                                                                                                              | [74]          |
| <i>Calothrix</i> sp.                                                    | Microscopic observation<br>and identification;                                                | Epiphytic on <i>A. marina</i> and <i>A. germinans</i><br>pneumatophores                                                                        | Gulf of Elat, Sinai Peninsula; Egyptian Red<br>Sea coast; East coast of the Baja California                                                                             | [67,71,72,76] |

|                                       |                                                                                      |                                                                                                                                          |                                                                                                                                |               |
|---------------------------------------|--------------------------------------------------------------------------------------|------------------------------------------------------------------------------------------------------------------------------------------|--------------------------------------------------------------------------------------------------------------------------------|---------------|
|                                       | isolation and microscopic identification                                             |                                                                                                                                          | Peninsula, Mexico; Cagar Alam Pulau Dua (CAPD) Serang, Banten                                                                  |               |
| <i>C. aeruginea</i>                   | Microscopic observation and identification                                           | Epiphytic on <i>A. marina</i> var. <i>marina</i> ; among other algae on pneumatophores                                                   | Shark Bay, Western Australia; Gulf of Elat, Sinai Peninsula                                                                    | [67,75]       |
| <i>C. breviarticulata</i>             | Isolation and microscopic identification                                             | Epiphytic on <i>A. marina</i> Vierth pneumatophores                                                                                      | Southern Red Sea coast of Saudi Arabia                                                                                         | [73]          |
| <i>C. contarenii</i>                  | Microscopic observation and identification                                           | Epiphytic on <i>A. marina</i> (Forssk.) Vierh. pneumatophores                                                                            | Mangroves in southern African estuaries; Kosi system, South Africa                                                             | [55,68]       |
| <i>C. scopulorum</i>                  | Microscopic observation                                                              | Epiphytic on <i>A. marina</i> (Forssk.) Vierh. pneumatophores                                                                            | Inhaca Island, Mozambique; Kosi system, South Africa                                                                           | [55,74]       |
| <i>Chamaecalyx</i> sp.                | Microscopic observation                                                              | Epiphytic on <i>A. germinans</i> pneumatophores                                                                                          | East coast of the Baja California Peninsula, Mexico                                                                            | [57,71]       |
| <i>Chamaecalyx leibleiniae</i>        | Microscopic observation                                                              | On <i>A. Marina</i> , associated with <i>Catenella</i> and <i>Murravella</i> sp.                                                         | Inhaca Island, Mozambique                                                                                                      | [74]          |
| <i>Chroococcus</i> sp.                | Microscopic observation and identification; isolation and microscopic identification | Epiphytic on <i>A. marina</i> and <i>A. germinans</i> pneumatophores                                                                     | Gulf of Elat, Sinai Peninsula; East coast of the Baja California Peninsula, Mexico; Cagar Alam Pulau Dua (CAPD) Serang, Banten | [57,67,71,76] |
| <i>C. obliteratus</i>                 | Microscopic observation                                                              | Epiphytic on <i>A. germinans</i> pneumatophores                                                                                          | East coast of the Baja California Peninsula, Mexico                                                                            | [57,71]       |
| <i>C. hansgirgii</i>                  | Microscopic observation and identification                                           | Within algal mucilage on <i>A. marina</i> (Forssk.) Vierh. pneumatophores; Epiphytic on <i>A. marina</i> (Forssk.) Vierh. pneumatophores | Mangroves in southern African estuaries; Kosi system, South Africa                                                             | [55,68]       |
| <i>C. minutus</i>                     | Microscopic observation                                                              | Epiphytic on <i>A. marina</i> Vierth pneumatophores                                                                                      | Southern Red Sea coast of Saudi Arabia                                                                                         | [73]          |
| <i>C. turgidus</i>                    | Microscopic observation and identification; isolation and microscopic identification | Within algal mucilage on <i>A. marina</i> (Forssk.) Vierh. pneumatophores; epiphytic on <i>A. marina</i> (Forssk.) Vierh. pneumatophores | Mangroves in southern African estuaries; Kosi system, South Africa; Southern Red Sea coast of Saudi Arabia                     | [55,68,73]    |
| <i>C. turgidus</i> var <i>maximus</i> | Microscopic observation                                                              | Epiphytic on <i>A. marina</i> (Forssk.) Vierh. pneumatophores                                                                            | Inhaca Island, Mozambique                                                                                                      | [74]          |

|                                                                                     |                                            |                                                                                                                       |                                                                                                                                                                                                 |                        |
|-------------------------------------------------------------------------------------|--------------------------------------------|-----------------------------------------------------------------------------------------------------------------------|-------------------------------------------------------------------------------------------------------------------------------------------------------------------------------------------------|------------------------|
| <i>Coleofasciculus chthonoplastes</i> (formerly <i>Microcoleus chthonoplastes</i> ) | Microscopic observation and identification | Epiphytic on <i>A. marina</i> (Forssk.) Vierh. pneumatophores; on <i>A. Marina</i> , associated with <i>red algae</i> | Mangroves in southern African estuaries; Inhaca Island, Mozambique; Beachwood Mangroves Nature Reserve, South Africa; Kosi system, South Africa; St Lucia Estuary; Shark Bay, Western Australia | [34,50,55,68,69,74,75] |
| <i>Cyanocystis olivacea</i> (formerly <i>Dermocarpa olivacea</i> )                  | Microscopic observation                    | Epiphytic on <i>A. marina</i> (Forssk.) Vierh. pneumatophores                                                         | Kosi system, South Africa                                                                                                                                                                       | [55]                   |
| <i>Dermocarpa acervata</i> (formerly <i>Xenococcus acervatus</i> )                  | Microscopic observation                    | Epiphytic on <i>A. marina</i> (Forssk.) Vierh. pneumatophores                                                         | Kosi system, South Africa; St Lucia Estuary; Inhaca Island, Mozambique                                                                                                                          | [50,55,74]             |
| <i>Dermocarpella stellata</i>                                                       | Microscopic observation                    | Epiphytic on <i>A. germinans</i> pneumatophores                                                                       | East coast of the Baja California Peninsula, Mexico                                                                                                                                             | [57,71]                |
| <i>Dichothrix penicillata</i>                                                       | Microscopic identification                 | Epiphytic on pneumatophores                                                                                           | Farasan Archipelago (Saudi Arabia), Red Sea                                                                                                                                                     | [58]                   |
| <i>D. utahensis</i>                                                                 | Microscopic observation                    | Epiphytic on <i>A. marina</i> var. <i>marina</i>                                                                      | Shark Bay, Western Australia                                                                                                                                                                    | [75]                   |
| <i>Geitlerinema</i> sp.                                                             | Microscopic observation                    | Epiphytic on <i>A. germinans</i> pneumatophores                                                                       | East coast of the Baja California Peninsula, Mexico                                                                                                                                             | [71]                   |
| <i>Gloeocapsa</i> sp.                                                               | Microscopic identification                 | Epiphytic on pneumatophores; in <i>Rivularia</i> colonies                                                             | Gulf of Elat, Sinai Peninsula                                                                                                                                                                   | [67]                   |
| <i>Heteroleibleinia</i> sp.                                                         | Microscopic observation                    | Epiphytic on <i>A. germinans</i> pneumatophores                                                                       | East coast of the Baja California Peninsula, Mexico                                                                                                                                             | [71]                   |
| <i>Heteroscytonema crispum</i> (formerly <i>Scytonema crispum</i> )                 | Microscopic observation                    | Epiphytic on <i>A. marina</i> var. <i>marina</i>                                                                      | Shark Bay, Western Australia                                                                                                                                                                    | [75]                   |
| <i>Hydrococcus</i> sp.                                                              | Microscopic observation                    | Epiphytic on <i>A. germinans</i> pneumatophores                                                                       | East coast of the Baja California Peninsula, Mexico                                                                                                                                             | [57,71]                |
| <i>Hydrococcus rivularis</i>                                                        | Microscopic observation                    | On <i>A. Marina</i> , associated with red algae; epiphytic on <i>A. marina</i> (Forssk.) Vierh. pneumatophores        | Inhaca Island, Mozambique; Kosi system, South Africa                                                                                                                                            | [55,74]                |

|                                                                         |                                                                   |                                                                                                   |                                                                                                                                         |                  |
|-------------------------------------------------------------------------|-------------------------------------------------------------------|---------------------------------------------------------------------------------------------------|-----------------------------------------------------------------------------------------------------------------------------------------|------------------|
| <i>Kamptonema chlorinum</i><br>(formerly <i>Oscillatoria chlorina</i> ) | Microscopic identification;<br>microscopic observation            | Epiphytic on <i>A. marina</i> (Forssk.) Vierh. pneumatophores                                     | Mangroves in southern African estuaries; Kosi system, South Africa                                                                      | [55,68]          |
| <i>Kamptonema okenii</i><br>(formerly <i>Oscillatoria okenii</i> )      | Microscopic observation and identification                        | Epiphytic on <i>A. marina</i> (Forssk.) Vierh. pneumatophores                                     | Beachwood Mangroves Nature Reserve, South Africa                                                                                        | [34,69]          |
| <i>Leptolynghya sp.</i>                                                 | Microscopic observation                                           | Epiphytic on <i>A. germinans</i> pneumatophores                                                   | East coast of the Baja California Peninsula, Mexico                                                                                     | [71]             |
| <i>L. tenuis</i>                                                        | Isolation and microscopic identification                          | Epiphytic on <i>A. marina</i> Vierth pneumatophores                                               | Southern Red Sea coast of Saudi Arabia                                                                                                  | [73]             |
| <i>Limnoraphis birgei</i><br>(formerly <i>Lyngbya birgei</i> )          | Microscopic observation                                           | Epiphytic on <i>A. marina</i> Vierth pneumatophores                                               | Southern Red Sea coast of Saudi Arabia                                                                                                  | [73]             |
| <i>Lyngbya sp.</i>                                                      | Microscopic observation; isolation and microscopic identification | Epiphytic on <i>A. marina</i> and <i>A. germinans</i> pneumatophores                              | Egyptian Red Sea coast; East coast of the Baja California Peninsula, Mexico; Shark Bay, Western Australia                               | [71,72,75]       |
| <i>L. cinerascens</i>                                                   | Microscopic identification                                        | Wrapped loosely around larger algae epiphytic on <i>A. marina</i> (Forssk.) Vierh. pneumatophores | Mangroves in southern African estuaries                                                                                                 | [68]             |
| <i>L. confervoides</i>                                                  | Microscopic observation and identification                        | Epiphytic on <i>A. marina</i> (Forssk.) Vierh. pneumatophores                                     | Mangroves in southern African estuaries; Inhaca Island, Mozambique; Beachwood Mangroves Nature Reserve, South Africa; St Lucia Estuary; | [34,50,68,69,74] |
| <i>L. lutea</i>                                                         | Microscopic identification                                        | Epiphytic on <i>A. marina</i> (Forssk.) Vierh. pneumatophores                                     | Mangroves in southern African estuaries                                                                                                 | [68]             |
| <i>L. majuscula</i>                                                     | Microscopic observation                                           | Epiphytic on <i>A. marina</i> (Forssk.) Vierh. pneumatophores                                     | Inhaca Island, Mozambique,                                                                                                              | [74]             |
| <i>L. majuscula</i>                                                     | Isolation and microscopic identification                          | Epiphytic on <i>A. marina</i> Vierth pneumatophores                                               | Southern Red Sea coast of Saudi Arabia                                                                                                  | [73]             |
| <i>L. martensiana</i>                                                   | Microscopic identification                                        | Epiphytic on pneumatophores                                                                       | Gulf of Elat, Sinai Peninsula                                                                                                           | [67]             |

|                                                                     |                                                                   |                                                                                                                                                     |                                                                                                  |            |
|---------------------------------------------------------------------|-------------------------------------------------------------------|-----------------------------------------------------------------------------------------------------------------------------------------------------|--------------------------------------------------------------------------------------------------|------------|
| <i>L. nigra</i>                                                     | Microscopic observation                                           | Epiphytic on <i>A. marina</i> (Forssk.) Vierh. pneumatophores                                                                                       | Inhaca Island, Mozambique                                                                        | [74]       |
| <i>L. semiplena</i>                                                 | Microscopic observation                                           | Epiphytic on <i>A. marina</i> var. <i>marina</i>                                                                                                    | Shark Bay, Western Australia                                                                     | [75]       |
| <i>Microcoleus</i> sp.                                              | Microscopic observation; isolation and microscopic identification | Epiphytic on <i>A. germinans</i> and <i>A. marina</i> pneumatophores                                                                                | Balandra coastal lagoon, Baja California Sur, Mexico; Cagar Alam Pulau Dua (CAPD) Serang, Banten | [42,71,76] |
| <i>Myxohyella papuana</i>                                           | Microscopic observation                                           | Epiphytic on <i>A. marina</i> var. <i>marina</i>                                                                                                    | Shark Bay, Western Australia                                                                     | [75]       |
| <i>Myxosarcina</i> sp.                                              | Isolation and microscopic identification                          | Epiphytic on <i>A. marina</i> pneumatophores                                                                                                        | Cagar Alam Pulau Dua (CAPD) Serang, Banten                                                       | [76]       |
| <i>Nodularia</i> sp.                                                | Microscopic observation                                           | Epiphytic on <i>A. marina</i> (Forssk.) Vierh. pneumatophores                                                                                       | Inhaca Island, Mozambique                                                                        | [74]       |
| <i>Oxynema acuminatum</i> (formerly <i>Oscillatoria acuminata</i> ) | Isolation and microscopic identification                          | Epiphytic on <i>A. marina</i> Vierth pneumatophores                                                                                                 | Southern Red Sea coast of Saudi Arabia                                                           | [73]       |
| <i>Oscillatoria</i> sp.                                             | Microscopic observation; isolation and microscopic identification | Epiphytic on <i>A. marina</i> (Forssk.) Vierh. pneumatophores                                                                                       | Egyptian Red Sea coast; Cagar Alam Pulau Dua (CAPD) Serang, Banten                               | [72,76]    |
| <i>O. corallinae</i>                                                | Microscopic identification                                        | Epiphytic on <i>A. marina</i> (Forssk.) Vierh. pneumatophores                                                                                       | Mangroves in southern African estuaries                                                          | [68]       |
| <i>O. limosa</i>                                                    | Microscopic identification; microscopic observation               | Epiphytic on <i>A. marina</i> (Forssk.) Vierh. pneumatophores                                                                                       | Mangroves in southern African estuaries; Kosi system, South Africa                               | [55,68]    |
| <i>O. crassa</i> (formerly <i>O. ornata</i> var. <i>crassa</i> )    | Isolation and microscopic identification                          | Epiphytic on <i>A. officinalis</i>                                                                                                                  | Kadalundi, Kerala, India                                                                         | [77]       |
| <i>O. proboscidea</i>                                               | Microscopic observation and identification                        | Epiphytic on <i>A. marina</i> (Forssk.) Vierh. Pneumatophores and intertwined with larger algae on <i>A. marina</i> (Forssk.) Vierh. pneumatophores | Beachwood Mangroves Nature Reserve, South Africa; Mangroves in southern African estuaries        | [34,68,69] |
| <i>O. sancta</i>                                                    | Microscopic observation                                           | Epiphytic on <i>A. marina</i> Vierth pneumatophores                                                                                                 | Southern Red Sea coast of Saudi Arabia                                                           | [73]       |



|                                                                    |                                                                   |                                                                                                                                             |                                                                                                             |               |
|--------------------------------------------------------------------|-------------------------------------------------------------------|---------------------------------------------------------------------------------------------------------------------------------------------|-------------------------------------------------------------------------------------------------------------|---------------|
| <i>O. subbrevis</i>                                                | Microscopic observation and identification                        | Epiphytic on <i>A. marina</i> (Forssk.) Vierh. pneumatophores                                                                               | St Lucia Estuary; Beachwood Mangroves Nature Reserve, South Africa; Mangroves in southern African estuaries |               |
| <i>O. tenuis</i>                                                   | Isolation and microscopic identification                          | Epiphytic on <i>A. marina</i> Vierth pneumatophores                                                                                         | Southern Red Sea coast of Saudi Arabia                                                                      | [73]          |
| <i>O. williei</i>                                                  | Microscopic observation                                           | Epiphytic on <i>A. marina</i> Vierth pneumatophores                                                                                         | Southern Red Sea coast of Saudi Arabia                                                                      | [73]          |
| <i>Phormidium</i> sp.                                              | Microscopic observation; isolation and microscopic identification | Epiphytic on <i>A. germinans</i> and <i>A. marina</i> pneumatophores                                                                        | East coast of the Baja California Peninsula, Mexico; Cagar Alam Pulau Dua (CAPD) Serang, Banten             | [71,76]       |
| <i>P. ambiguum</i>                                                 | Microscopic observation and identification                        | In dense interwoven mats on <i>A. marina</i> (Forssk.) Vierh. Pneumatophores; epiphytic on <i>A. marina</i> (Forssk.) Vierh. pneumatophores | Mangroves in southern African estuaries; Kosi system, South Africa                                          | [55,68]       |
| <i>P. holdenii</i> (formerly <i>Leibleinia subtilis</i> )          | Microscopic observation                                           | Epiphytic on <i>A. germinans</i> pneumatophores                                                                                             | East coast of the Baja California Peninsula, Mexico                                                         | [71]          |
| <i>P. allorgei</i> (formerly <i>Lyngbya allorgei</i> )             | Microscopic observation and identification                        | Epiphytic on pneumatophores                                                                                                                 | Gulf of Elat, Sinai Peninsula                                                                               | [67]          |
| <i>P. baculum</i> (formerly <i>Lyngbya baculum</i> )               | Microscopic observation                                           | Epiphytic on <i>A. marina</i> (Forssk.) Vierh. pneumatophores                                                                               | St Lucia Estuary                                                                                            | [50]          |
| <i>P. nigroviride</i> (formerly <i>Oscillatoria nigroviridis</i> ) | Microscopic observation and identification                        | Epiphytic on <i>A. marina</i> (Forssk.) Vierh. pneumatophores                                                                               | Beachwood Mangroves Nature Reserve, South Africa; mangroves in southern African estuaries; St Lucia Estuary | [34,50,68,69] |
| <i>P. schultzei</i> (formerly <i>Oscillatoria schultzei</i> )      | Microscopic observation and identification                        | Mixed with epipelagic algae and epiphytic on <i>A. marina</i> (Forssk.) Vierh. pneumatophores                                               | Beachwood Mangroves Nature Reserve, South Africa; mangroves in southern African estuaries                   | [34,68,69]    |
| <i>Pleurocapsa</i> sp.                                             | Microscopic identification                                        | Epiphytic on pneumatophores                                                                                                                 | Gulf of Elat, Sinai Peninsula                                                                               | [67]          |
| <i>Pseudanabaena</i> sp.                                           | Microscopic observation                                           | Epiphytic on <i>A. germinans</i> pneumatophores                                                                                             | East coast of the Baja California Peninsula, Mexico                                                         | [71]          |
| <i>Pseudanabaena catenata</i>                                      | Isolation and microscopic identification                          | Epiphytic on <i>A. marina</i> Vierth pneumatophores                                                                                         | Southern Red Sea coast of Saudi Arabia                                                                      | [73]          |

|                                                                   |                                                                                      |                                                                                             |                                                                                                                                                              |                  |
|-------------------------------------------------------------------|--------------------------------------------------------------------------------------|---------------------------------------------------------------------------------------------|--------------------------------------------------------------------------------------------------------------------------------------------------------------|------------------|
| <i>Rivularia</i> sp.                                              | Microscopic observation and identification                                           | Epiphytic on <i>Sonneratia alba</i> pneumatophores and pneumatophores                       | Gulf of Elat, Sinai Peninsula; mangrove areas around Zanzibar                                                                                                | [36,67]          |
| <i>R. atra</i>                                                    | Microscopic observation                                                              | Epiphytic on <i>A. marina</i> var. <i>marina</i>                                            | Shark Bay, Western Australia                                                                                                                                 | [75]             |
| <i>R. bullata</i>                                                 | Microscopic observation and identification                                           | Epiphytic on <i>A. marina</i> (Forssk.) Vierh. pneumatophores                               | Mangroves in southern African estuaries; Kosi system, South Africa                                                                                           | [55,68]          |
| <i>R. polyotis</i>                                                | Microscopic observation and identification                                           | Epiphytic on pneumatophores; epiphytic on <i>A. marina</i> (Forssk.) Vierh. pneumatophores  | Farasan Archipelago (Saudi Arabia), Red Sea; Egyptian Red Sea coast                                                                                          | [58,72]          |
| <i>Schizothrix arenaria</i>                                       | Microscopic identification                                                           | Intertwined with larger algae epiphytic on <i>A. marina</i> (Forssk.) Vierh. pneumatophores | Mangroves in southern African estuaries                                                                                                                      | [68]             |
| <i>Scytonematopsis crustacea</i> (formerly <i>C. crustacean</i> ) | Microscopic identification                                                           | Epiphytic on pneumatophores                                                                 | Gulf of Elat, Sinai Peninsula                                                                                                                                | [67]             |
| <i>Scytonema</i> sp.                                              | Microscopic observation and identification                                           | Collars on pneumatophores; epiphytic on <i>Sonneratia alba</i> pneumatophores               | Gulf of Elat, Sinai Peninsula; mangrove areas around Zanzibar                                                                                                | [36,67]          |
| <i>Scytonema hoffmannii</i>                                       | Microscopic observation                                                              | Epiphytic on <i>A. marina</i> (Forssk.) Vierh. pneumatophores                               | Kosi system, South Africa                                                                                                                                    | [55]             |
| <i>Spirulina subsalsa</i>                                         | Microscopic observation and identification; isolation and microscopic identification | Epiphytic on <i>A. marina</i> (Forssk.) Vierh. and <i>A. marina</i> Vierth pneumatophores   | Mangroves in southern African estuaries; Kosi system, South Africa; Beachwood Mangroves Nature Reserve, South Africa; Southern Red Sea coast of Saudi Arabia | [34,55,68,69,73] |
| <i>Stichosiphon</i> sp.                                           | Microscopic observation                                                              | On <i>A. Marina</i> , associated with red algae                                             | Inhaca Island, Mozambique,                                                                                                                                   | [74]             |
| <i>Xenococcus</i> sp.                                             | Microscopic observation                                                              | Epiphytic on <i>A. germinans</i> pneumatophores                                             | East coast of the Baja California Peninsula, Mexico                                                                                                          | [57,71]          |
| <i>Xenococcus chaetomorphae</i>                                   | Microscopic observation                                                              | Epiphytic on <i>A. germinans</i> pneumatophores                                             | East coast of the Baja California Peninsula, Mexico                                                                                                          | [57,71]          |
| <i>Xenotholos kernerii</i> (formerly <i>Xenococcus kernerii</i> ) | Microscopic observation                                                              | Epiphytic on <i>A. marina</i> (Forssk.) Vierh. pneumatophores                               | St Lucia Estuary; Kosi system, South Africa                                                                                                                  | [50,55]          |
